# Supplementary material
Source: PubMed Central journal article supplement (PMC1855358)

**A**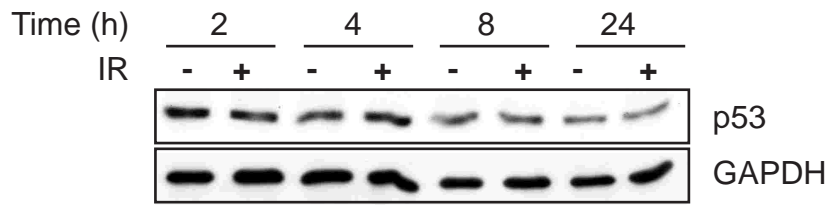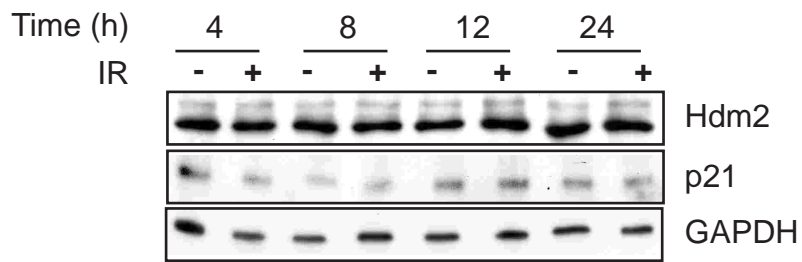**B**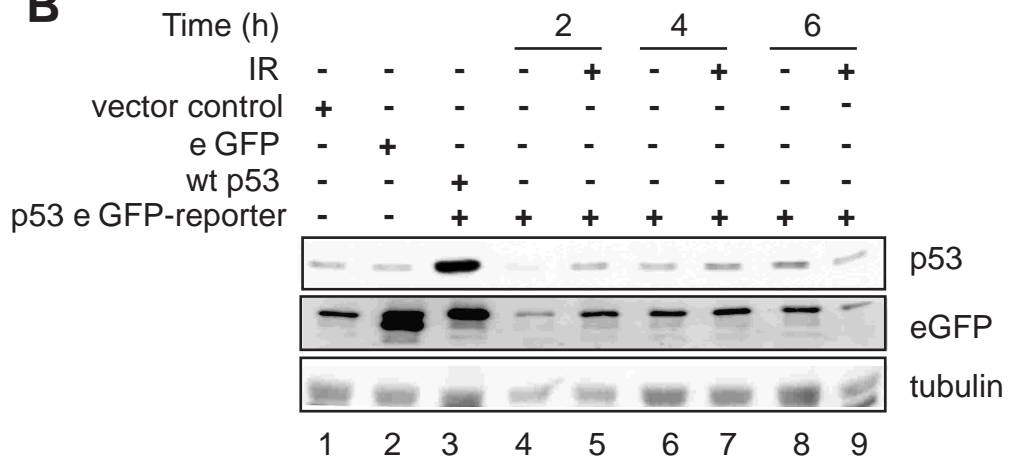

Supplement: pnas_0609299104_1.pdf [file pnas_0609299104_1.pdf]

**A**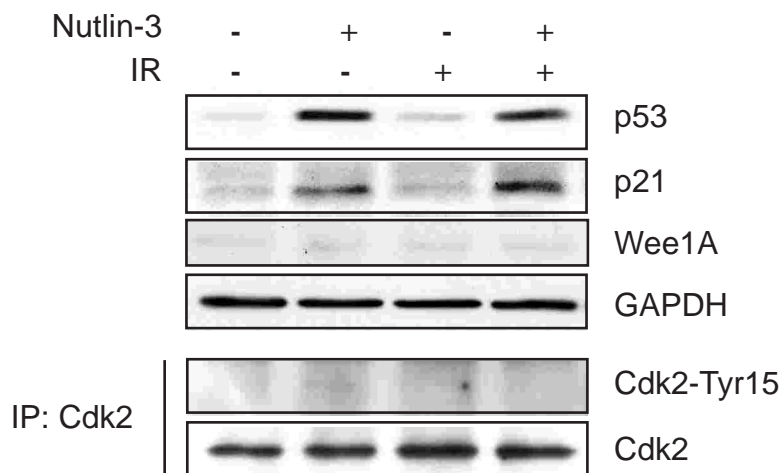**B**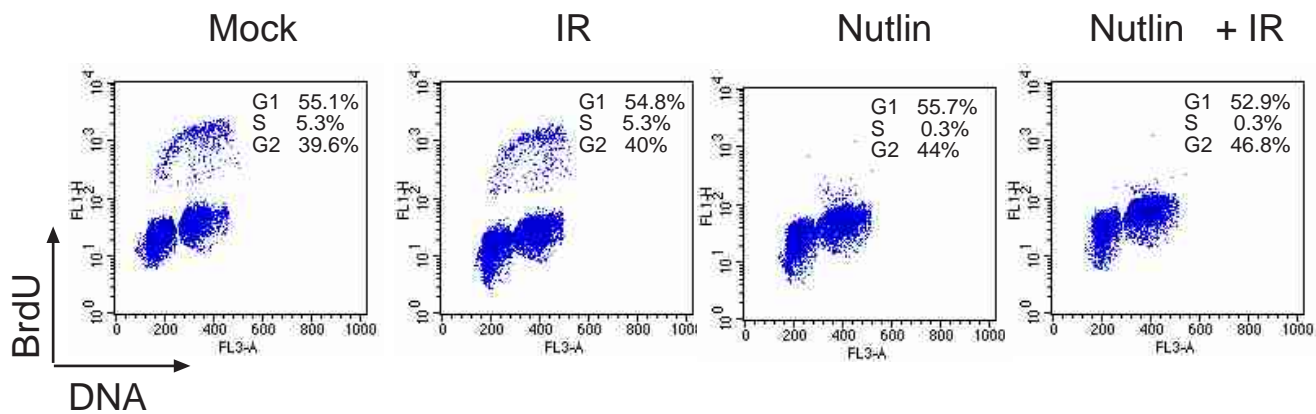

Supplement: pnas_0609299104_2.pdf [file pnas_0609299104_2.pdf]

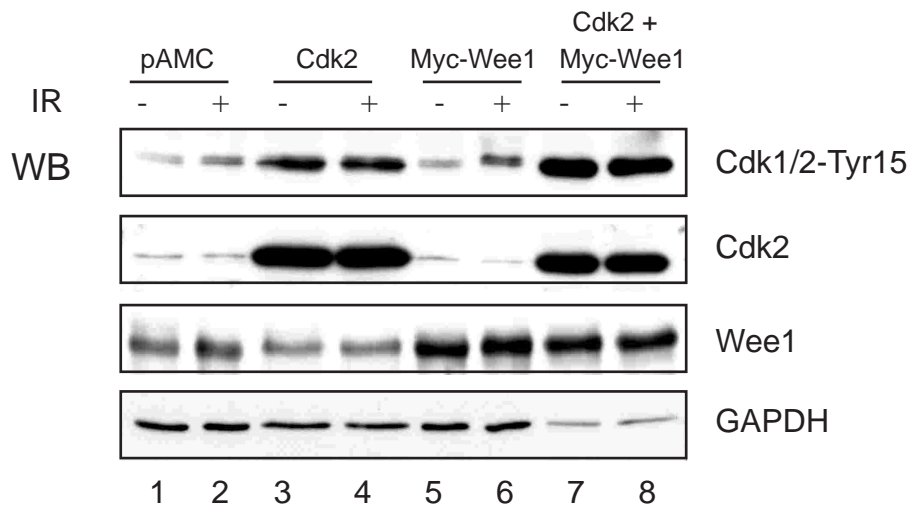

Supplement: pnas_0609299104_3.pdf [file pnas_0609299104_3.pdf]

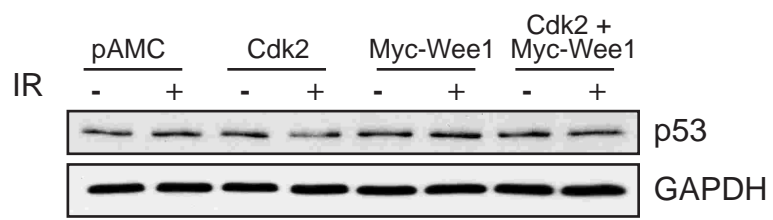

Supplement: pnas_0609299104_4.pdf [file pnas_0609299104_4.pdf]

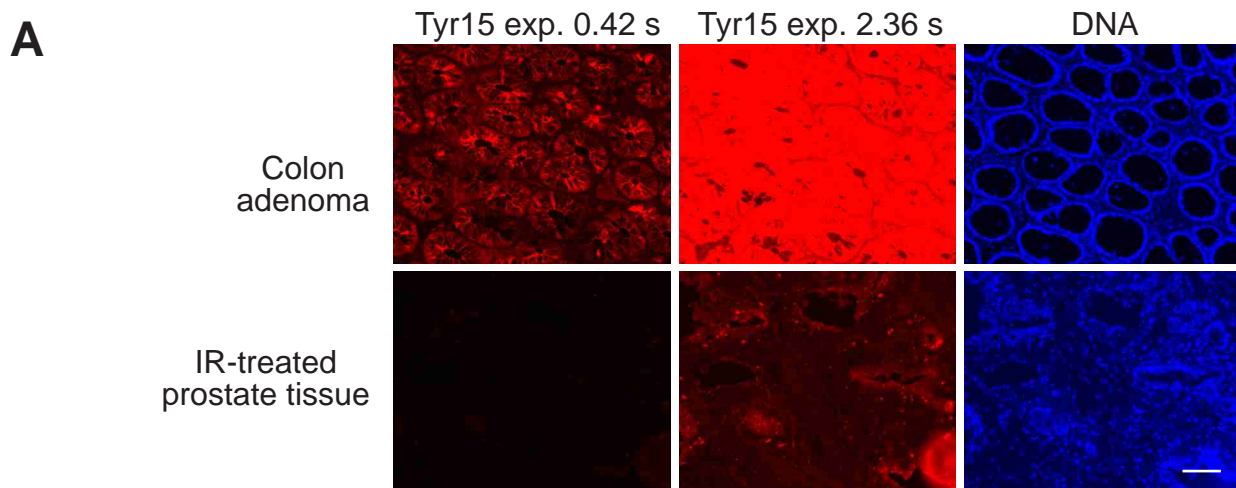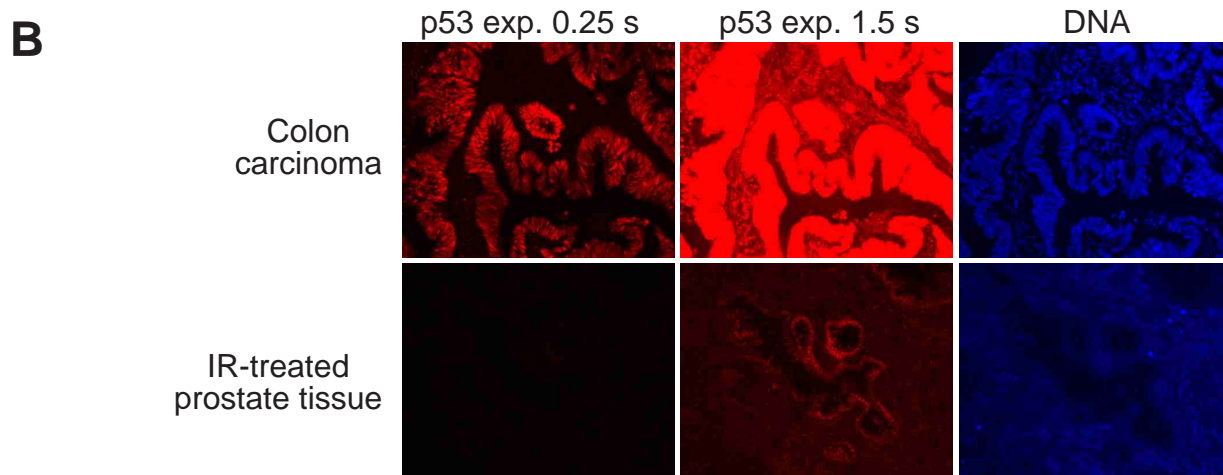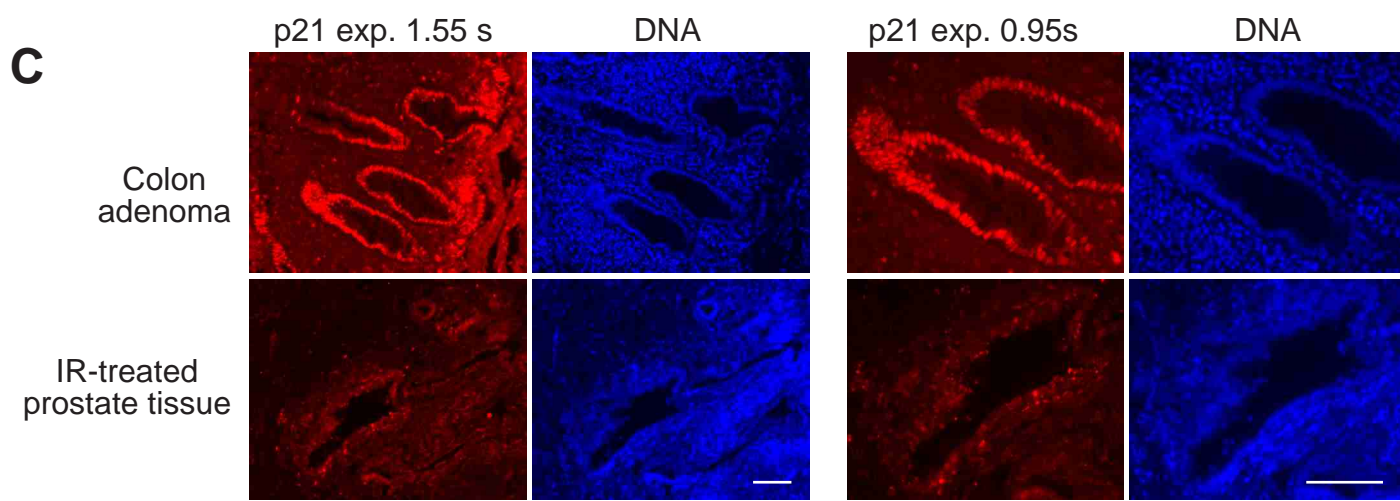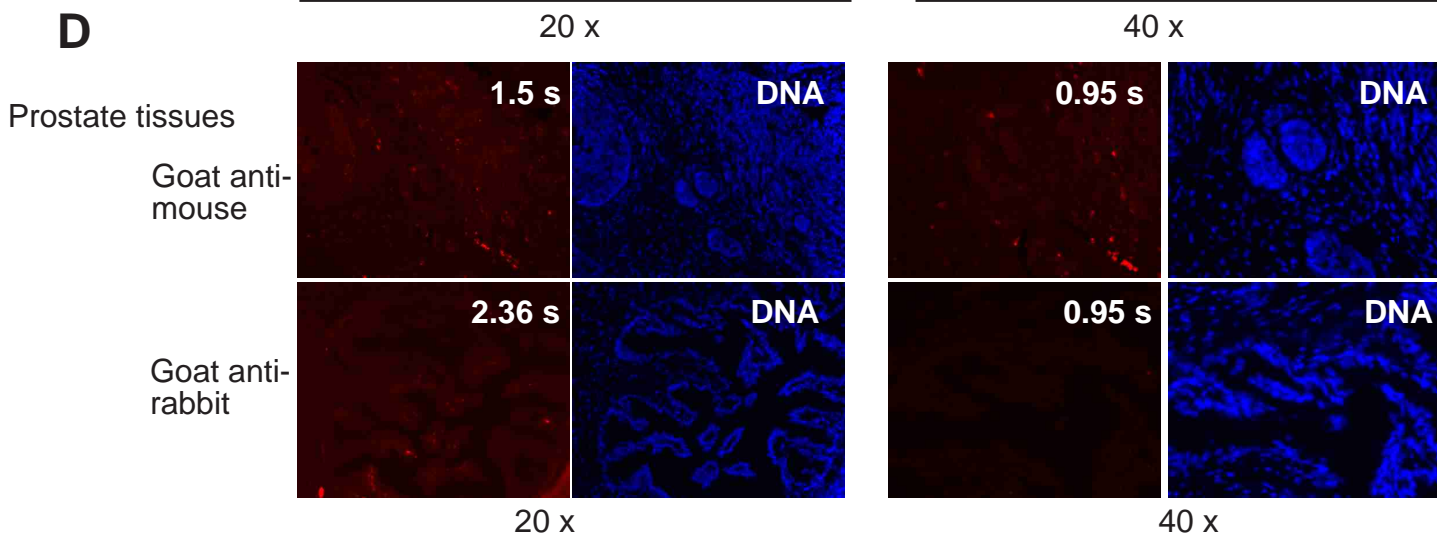

Supplement: pnas_0609299104_5.pdf [file pnas_0609299104_5.pdf]

**Ex vivo prostate tissues**

**Control**

**Nutlin**

**Leptomycin B**

**p53 (DO7)**

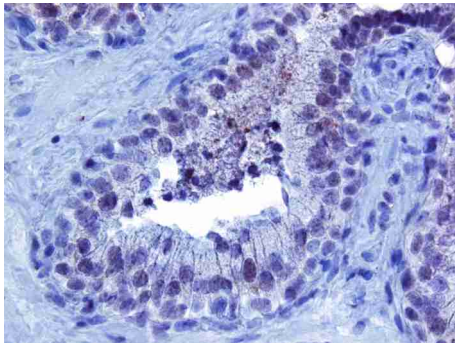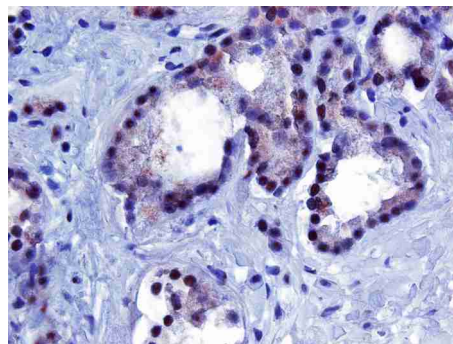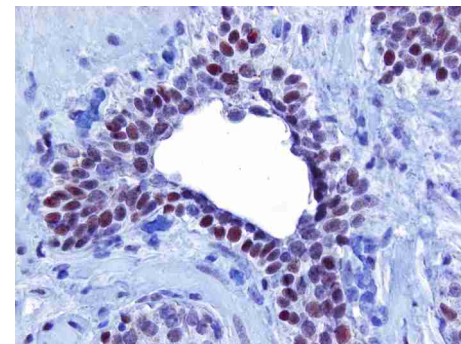

Supplement: pnas_0609299104_6.pdf [file pnas_0609299104_6.pdf]
